# Supplementary material for: Synthesis, characterization and biological evaluation of a new photoactive hydrogel against Gram-positive and Gram-negative bacteria
Source: Royal Society of Chemistry journal article supplement (doi:10.1039/c5tb02569a), 2016-01-01
Supplement: c5tb02569a1.pdf [file c5tb02569a1.pdf]

## Electronic supplementary information (ESI)

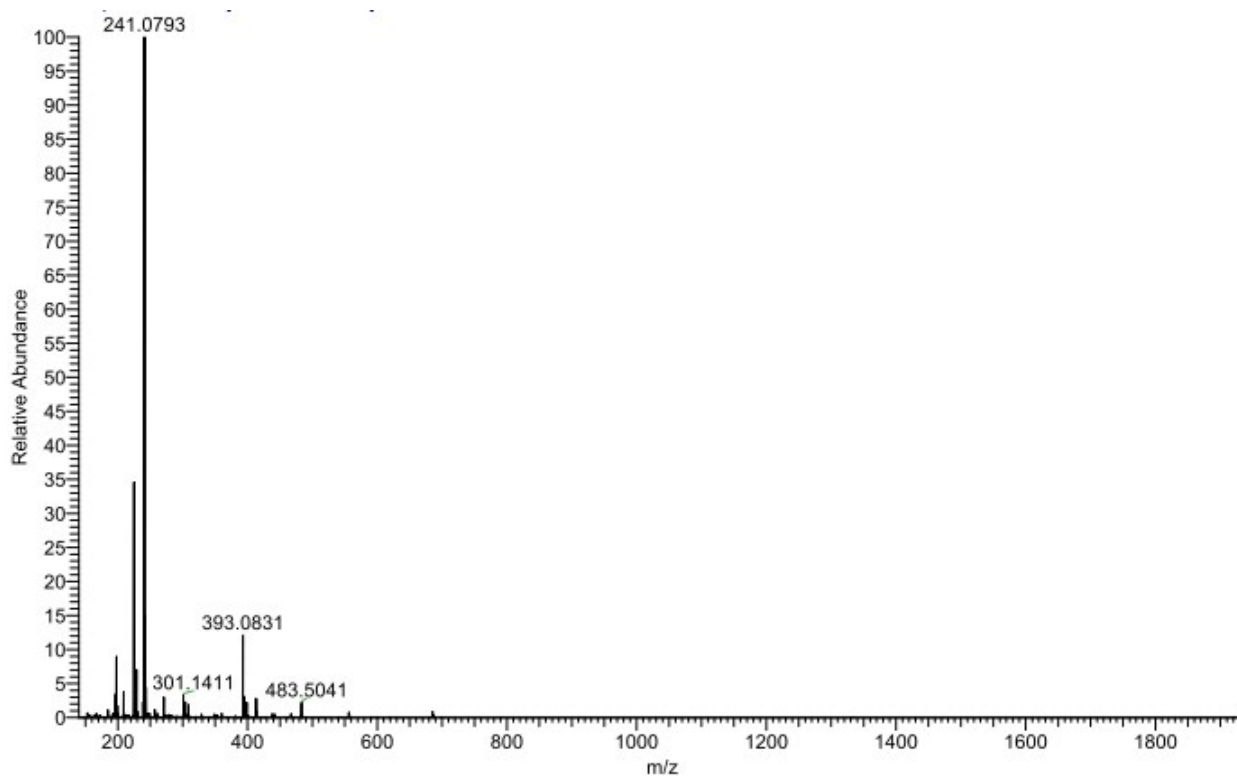

**Figure S1.** ESI-MS ( $m/z$ )(MeOH +  $\text{NH}_4\text{OAc}$ ): calcd. for **2** ( $\text{C}_{14}\text{H}_{13}\text{N}_2\text{S}$ ) 241.0794 found ( $\text{M}^+$ ):

241.0793

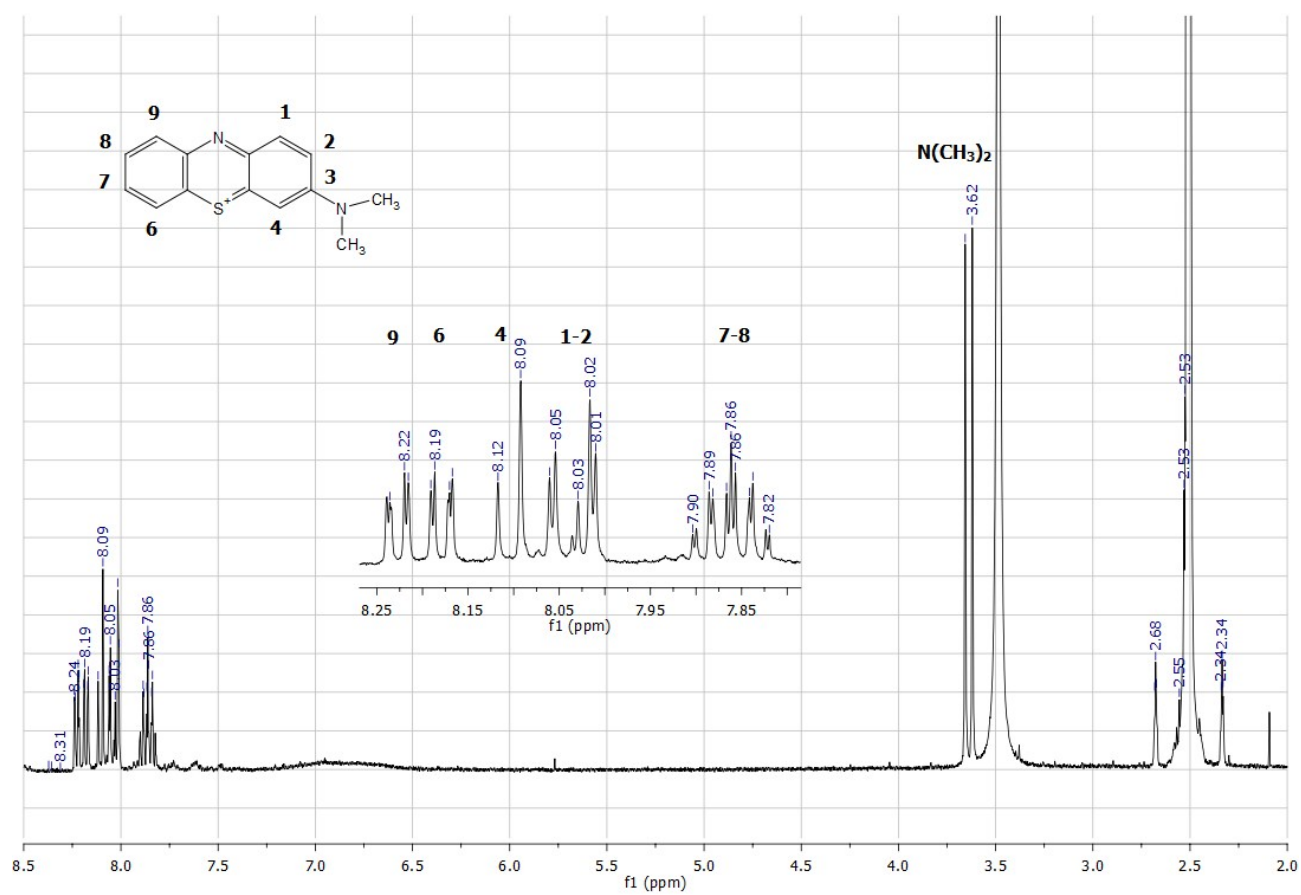

**Figure S2.**  $^1\text{H}$  NMR spectrum of **2** in  $\text{DMSO}-d_6$

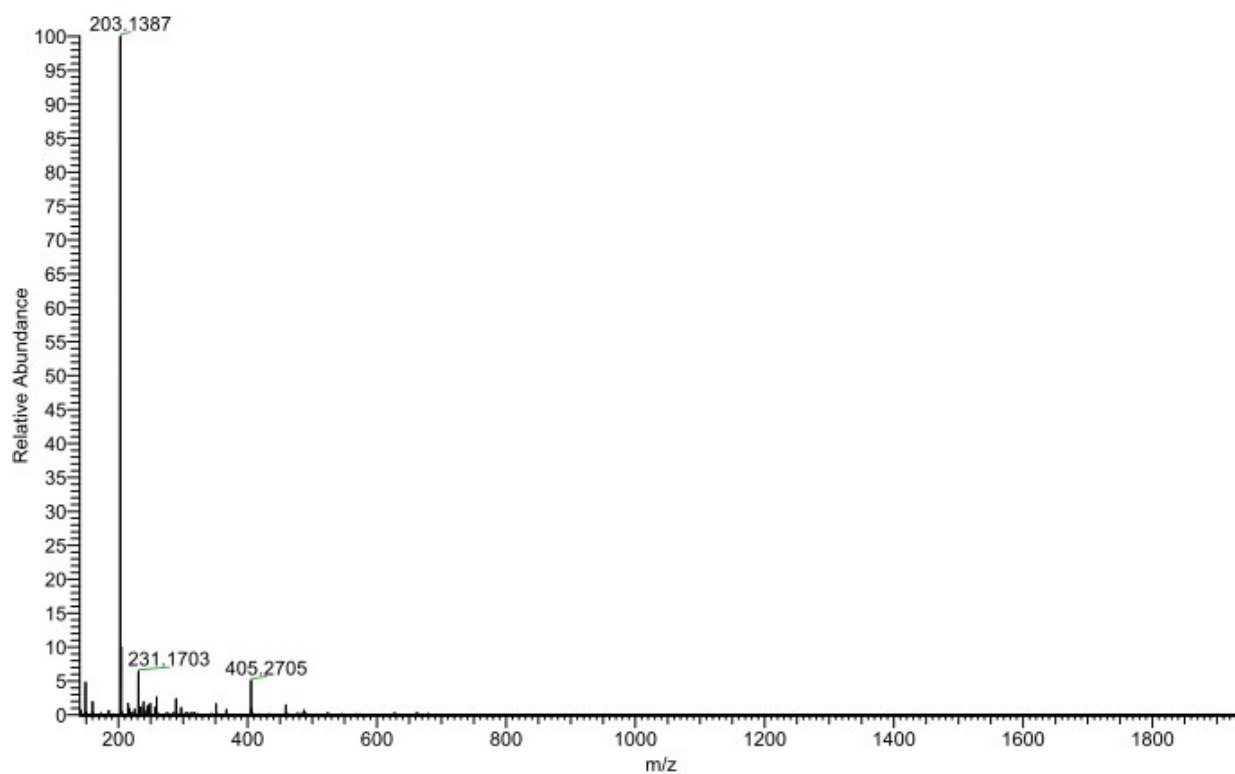

**Figure S3.** ESI-MS (m/z) (MeOH + NH<sub>4</sub>OAc): calcd. for **5** (C<sub>9</sub>H<sub>19</sub>N<sub>2</sub>O<sub>3</sub>): 202.1387; found (MH)<sup>+</sup>: 203.1387

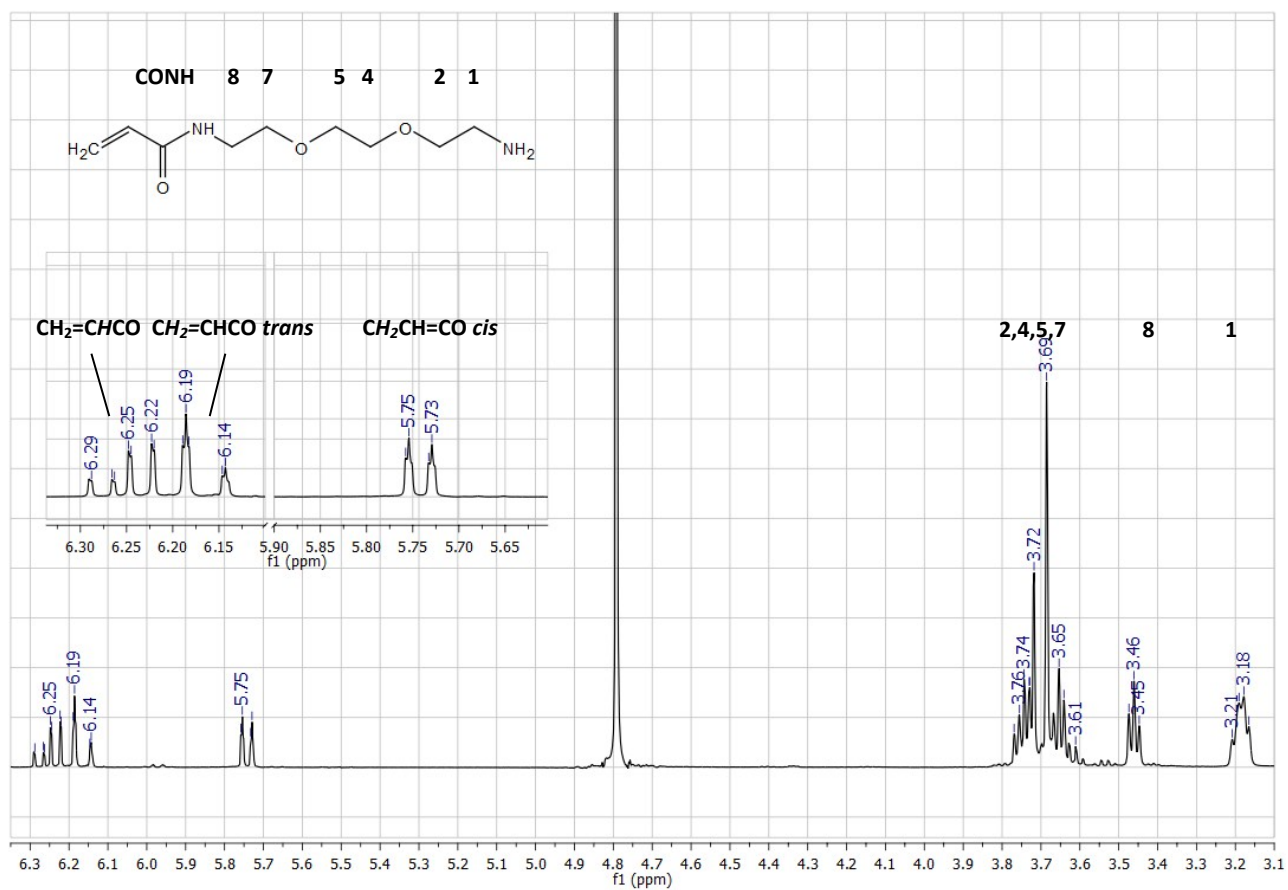

**Figure S4.**  $^1\text{H}$  NMR spectrum of **5** in  $\text{D}_2\text{O}$



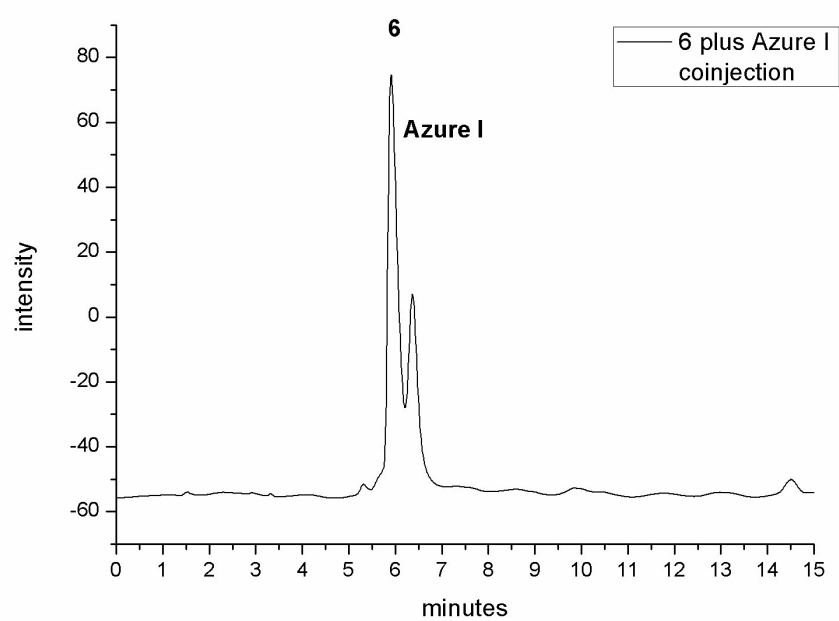

**Figure S7.** HPLC trace of phenothiazinum derivative **6** and Azure I coinjected for qualitative comparison. Gradient: see Material and Methods

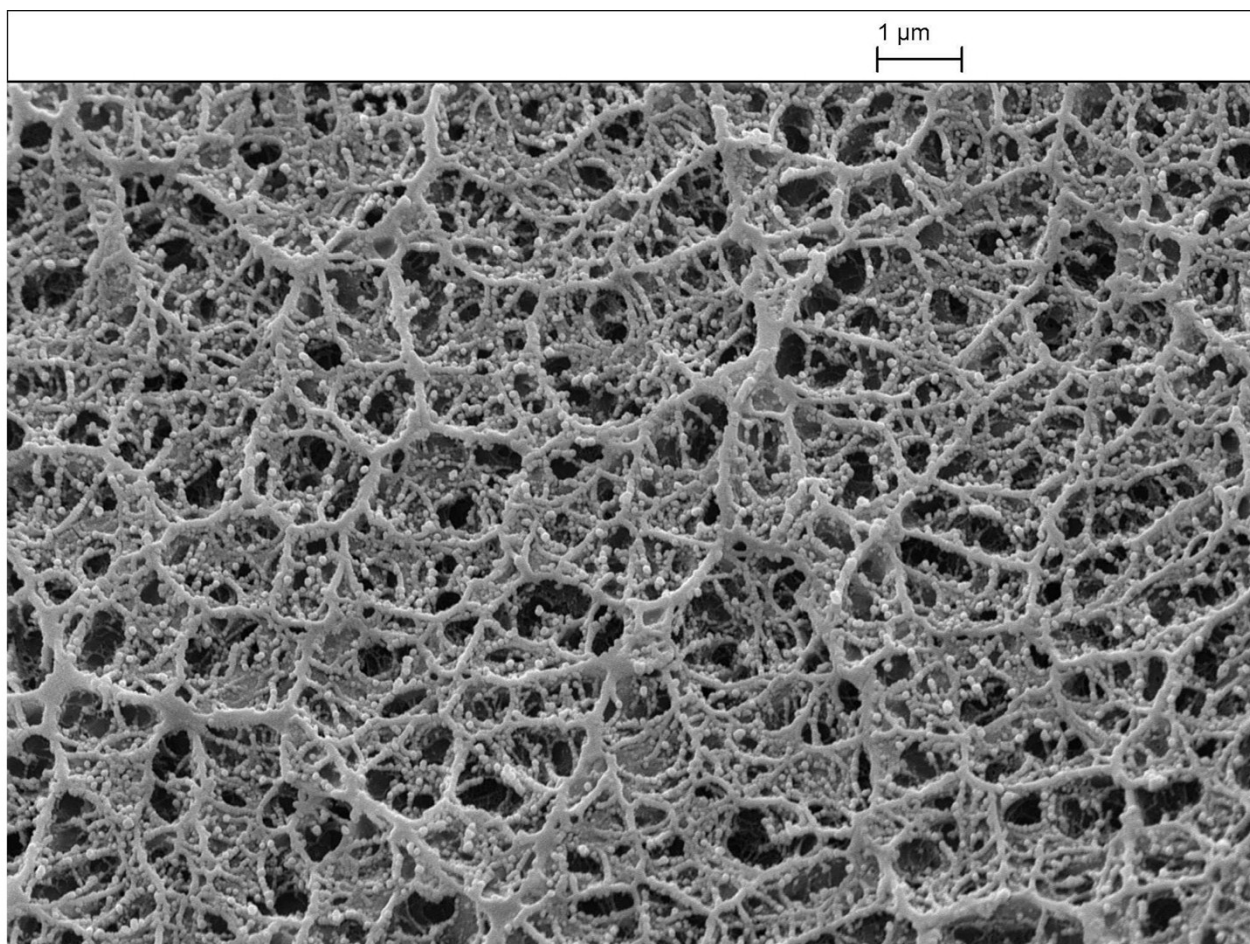

**Figure S8.** SEM surface images of **7** after irradiation with visible light for 25 minutes.

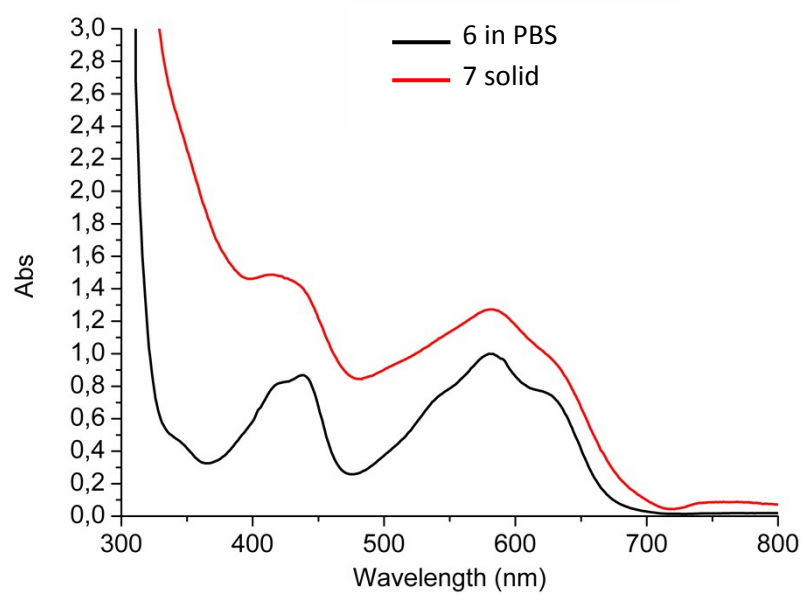

**Figure S9.** Absorption spectra of **6** in PBS solution and immobilized ( $1 \text{ mg/cm}^2$ )

a)

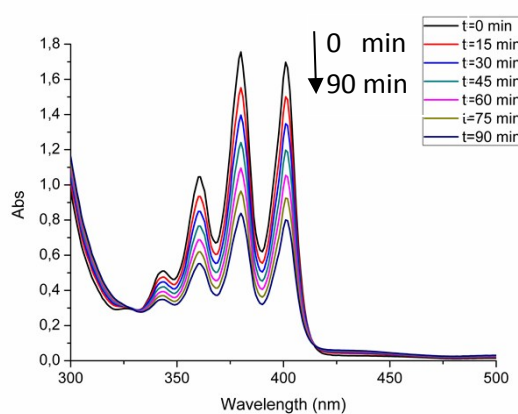

b)

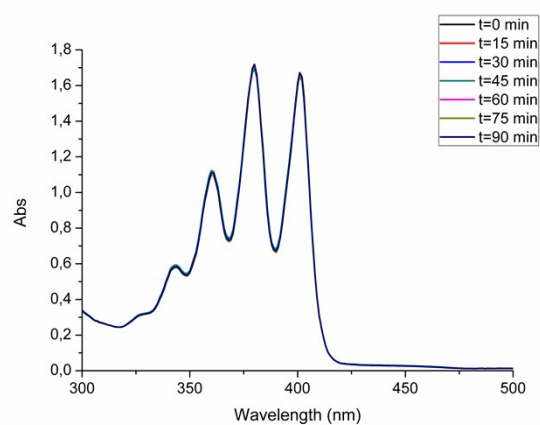

c)

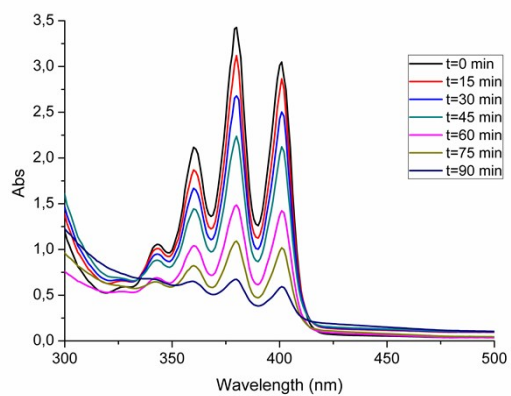

**Figure S10.** Absorption spectra of ABDA ( $150 \mu\text{mol L}^{-1}$ ) in PBS solution (pH=7.0) photosensitized by **7** (a), **8** (b) and **6** (c).



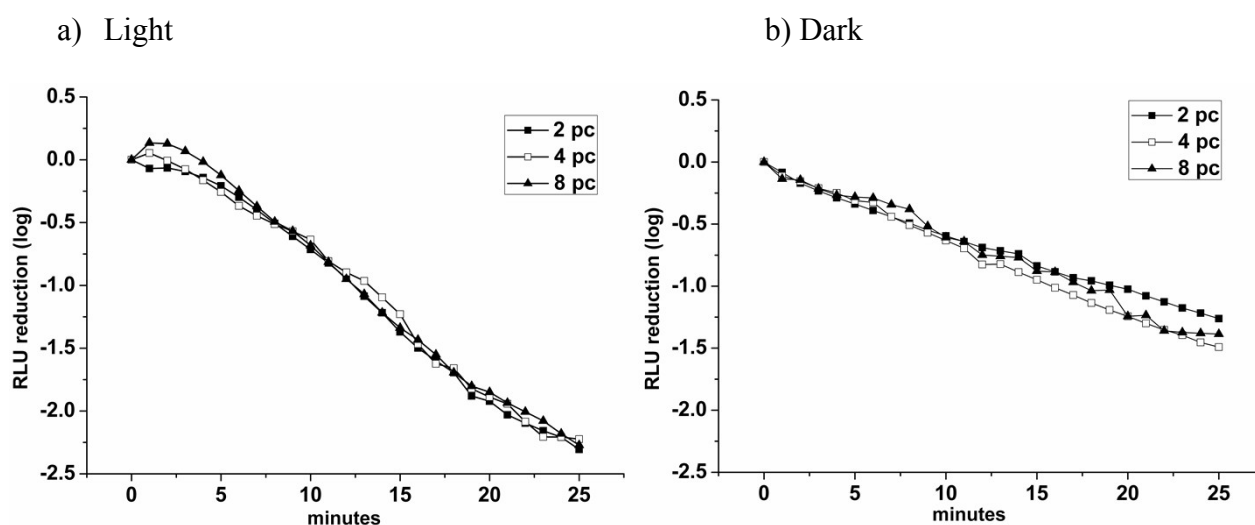

**Figure S11.** Kill curves obtained for the 1 mg/cm<sup>3</sup> photoantimicrobial hydrogel previously cut in 2, 4, 8 squares against *E. coli* under light illumination (a) for 25 min (fluence rate of 14.5 mW/cm<sup>2</sup> and a total light dose 21.8 J/cm<sup>2</sup>) and in the dark (b). Dark and light experiments were done with the cell suspensions of  $2 \times 10^6$  CFU ml<sup>-1</sup>. The optical fiber was placed 6 cm from the plates. Values represent the mean of two separate experiments.

The filled squares correspond to the killing curve obtained adding 2 pieces of 7 to the *E. coli* suspension. The open squares corresponds to the killing curve obtained adding 4 pieces of 7 to the *E. coli* suspension while the filled triangles correspond to the killing curve obtained adding 8 pieces of 7 to the *E. coli* suspension.
